# Supplementary material
Source: ML conference proceedings conference paper supplement (https://aclanthology.org/2021.eacl-main.222)
Supplement: Software [file 2021.eacl-main.222.Software.zip]

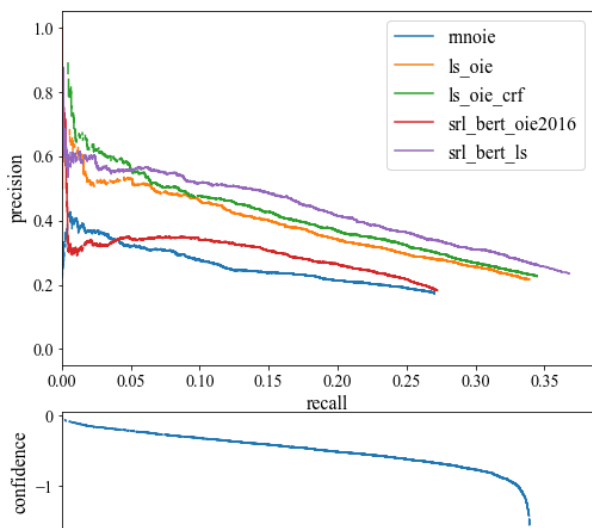

Figure 1: Top: performance of Supervised OIE systems on the LSOIE test set. Bottom: ls\_oie estimated confidence at each extraction. As recall increases, confidence drops.

## Appendix

Figure 1 shows precision and recall curves on the LSOIE test set, accompanied by the ls\_oie's estimated confidence.
